# Supplementary material
Source: PubMed Central journal article supplement (PMC3697978)
Supplement: 8c29f96183680be3991f7d35b76baee6_genetics.113.151217-2.pdf [file 8c29f96183680be3991f7d35b76baee6_genetics.113.151217-2.pdf]

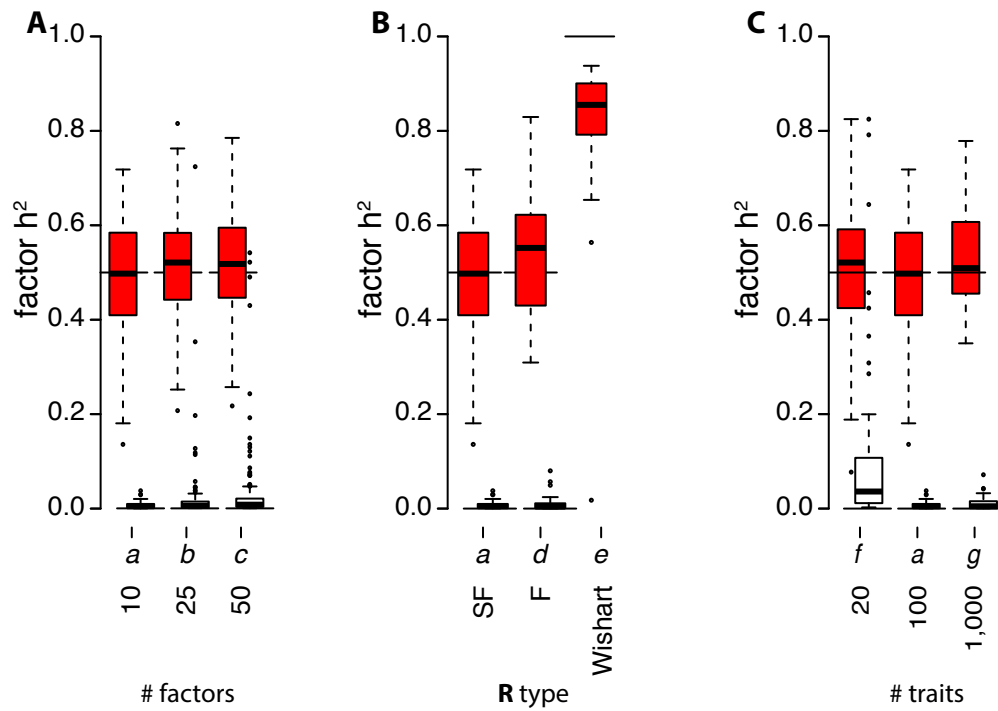

FIGURE S2. **Latent factor heritabilities were accurately recovered.** Distributions of factor  $h^2$  estimates by simulation scenario. Each simulated factor was matched to the estimated factor with the most similar trait-loadings as in Figure 3. Thin horizontal lines in each column show the simulated  $h^2$  values. Red boxes show the distribution of factor  $h^2$  estimates across 10 simulations for all factors with  $h^2 = 0.5$  or  $1.0$ . Black boxes show the distribution of factor  $h^2$  estimates across the same 10 simulations for all factors with  $h^2 = 0.0$ . Scenarios differed by: (A) Increasing numbers of simulated factors. (B) Different types of  $\mathbf{R}$  matrices. (C) Different numbers of traits.
